# Supplementary material for: A Mediterranean drifters dataset: 1998–2022
Source: Copernicus journal article supplement (doi:10.5194/essd-2022-344), 2022-11-10

To  
CC1  
and Cc  
Dr. Giuseppe M.R. Manzella  
ESSD Chief Editor,  
Dr. Alessio Rovere  
ESSD topical editor  
and  
the ESSD Editorial Support Team

Oristano, 11/05/2023

Subject: reply to Referee's comments on "A Mediterranean drifters dataset: 1998–2022" by Alberto Ribotti, Antonio Bussani, Milena Menna, Andrea Satta, Roberto Sorgente, Andrea Cucco, and Riccardo Gerin, Earth Syst. Sci. Data Discuss., <https://doi.org/10.5194/essd-2022-344>

**CC1: 'Comment on essd-2022-344', Adam Gauci, 10 Jan 2023**

*This work presents various drifter experiments that were carried out between 1998 and 2022. In Section 2 of the paper, the authors put forward the characteristics and specifications of the four types of drifters used. Very good and relevant comparisons between the instrument dimensions, battery duration, data transmission type, and data formats, are made. Clearly, the authors have extensive knowledge and experience in using and deploying such equipment. The points mentioned are useful to anyone that plans to carry out similar experiments in the same region or elsewhere. In Section 3, details about the data quality control procedures are provided. This has also been carried out meticulously and follows the current state-of-the-art methods. Details of how the data is saved and what information is stored are also mentioned. The 138 trajectories that are discussed are also made freely available. This dataset is useful to several users working with data assimilation or HF radar validation. Well done to the authors. Excellent work!*

REPLY: We thank Dr. Adam Gauci for his assessment of our work. We hope that the dataset will prove useful and that the manuscript in its final form, after careful revision, will be of more interest.

Best regards,



Supplement: Supplementary file [file essd-2022-344-AC3-supplement.pdf]
