# Supplementary material for: A Mediterranean drifters dataset: 1998–2022
Source: Copernicus journal article supplement (doi:10.5194/essd-2022-344), 2022-11-10
Supplement: Supplementary file [file essd-2022-344-RC2-supplement.pdf]

The article entitled “A Mediterranean drifters dataset: 1998–2022” contains a series of files with trajectories of different kinds of drifters deployed between 1998 and 2021. Lagrangian drifters are a very useful tool for understanding the surface circulation of the ocean, as well as for determining mesoscale and submesoscale structures that are related to areas of accumulation of larvae or plastics, among others. However, in this work, the dataset needs to be revised in order to be used by other users in the scientific community. On one hand, title of the paper does not seem appropriate, since, as indicated in the manuscript, the first buoy deployment experiments were carried out in the years 1998-1999 but were not repeated until 10 years later, so this title is misleading. And on the other hand, some files (e.g. hrib\_LCE230) are not related to Mediterranean tracks (they show latitudes of 68 – 70 °N). The work needs a great deal of effort to improve its quality in order to be published.

## **ABSTRACT**

Here, and along the manuscript, you say that the dataset belongs to 138 experiments but there are 204 tracks, could you explain why? trajectories of which drifters were divided?

## **INTRODUCTION**

Are there previous Lagrangian experiments in the study area? Why is this dataset important?

## **THE DRIFTERS**

Table 1 and Figure 1

As above mentioned, some files are not from the Mediterranean Sea. Please remove them from this dataset and article, or include them but change the study area and so on. Some of these drifters are: hrib\_LCE230; mrib\_LCE227; mrib\_LCE229; prib\_LCE229; qrib\_LCE229; urib\_LCE229; vrib\_LCE229; (...).

In my opinion, in order to be able to draw conclusions about the Lagrangian motion, it is necessary to have several points of the buoy's motion, which allow for concluding how the circulation in an area is. In this work, many trajectories are presented with little data (less than 10), so I do not consider that they give information. I attach a table with all the available buoys and the number of data.

| Drifter name   | number of data | Drifter name    | number of data | Drifter name   | number of data | Drifter name   | number of data | Drifter name | number of data | Drifter name | number of data |
|----------------|----------------|-----------------|----------------|----------------|----------------|----------------|----------------|--------------|----------------|--------------|----------------|
| asrib_LCA113   | 2              | arib_LCA122     | 33             | brib_CODE94657 | 4              | crib_LCE234    | 879            | jrjib_LCA127 | 2              | vrjib_LCE229 | 32             |
| asrib_LCA197   | 3              | arib_LCA123     | 126            | brib_CODE94658 | 62             | crib_LCE236    | 2799           | jrjib_LCE227 | 29             | wrjib_LCA116 | 2              |
| asrib_LCA197   | 4              | arib_LCA124     | 3              | brib_LCA075    | 4              | crib_LCE348    | 402            | jrjib_LCE229 | 38             | wrjib_LCE229 | 28             |
| asrib_LCA113   | 2              | arib_LCA125     | 26             | brib_LCA076    | 7              | crib_LCH353    | 363            | krjib_CLD    | 2              | xrjib_LCE229 | 9              |
| asrib_LCA197   | 10             | arib_LCA126     | 94             | brib_LCA077    | 24             | drib_CLD       | 4              | krjib_LCA112 | 6              | yrjib_LCA116 | 2              |
| asrib_LCA197   | 2              | arib_LCA127     | 2              | brib_LCA113    | 6              | drib_CODE94658 | 7              | krjib_LCA113 | 2              | yrjib_LCE229 | 41             |
| asrib_LCA197   | 3              | arib_LCA128     | 3              | brib_LCA116    | 7              | drib_LCA076    | 5              | krjib_LCE227 | 14             | zrjib_LCA113 | 2              |
| asrib_LCA197   | 3              | arib_LCA132     | 82             | brib_LCA120    | 96             | drib_LCA127    | 31             | krjib_LCE229 | 3              | zrjib_LCA197 | 4              |
| asrib_LCA116   | 2              | arib_LCE227     | 1231           | brib_LCA121    | 109            | drib_LCE227    | 5              | lrjib_CLD    | 5              | zrjib_LCE229 | 4              |
| asrib_LCA197   | 10             | arib_LCE228     | 30             | brib_LCA122    | 8              | drib_LCE229    | 4              | lrjib_LCA113 | 3              |              |                |
| asrib_LCA116   | 2              | arib_LCE229     | 587            | brib_LCA124    | 18             | drib_LCE230    | 18             | lrjib_LCE227 | 6              |              |                |
| asrib_LCA128   | 21             | arib_LCE230     | 482            | brib_LCA125    | 22             | drib_LCE234    | 71             | lrjib_LCE229 | 98             |              |                |
| asrib_LCA113   | 7              | arib_LCE231     | 236            | brib_LCA128    | 5              | drib_LCE236    | 147            | mrjib_CLD    | 5              |              |                |
| asrib_LCA128   | 36             | arib_LCE232     | 271            | brib_LCE227    | 22             | drib_LCE348    | 51             | mrjib_LCA112 | 31             |              |                |
| asrib_LCA113   | 21             | arib_LCE233     | 96             | brib_LCE229    | 17             | drib_LCE227    | 22             | mrjib_LCE227 | 1010           |              |                |
| asrib_LCA128   | 25             | arib_LCE234     | 239            | brib_LCE230    | 29             | drib_LCE229    | 4              | mrjib_LCE229 | 47             |              |                |
| asrib_LCA113   | 3              | arib_LCE235     | 64             | brib_LCE231    | 607            | drib_LCE230    | 12             | nrjib_CLD    | 5              |              |                |
| asrib_LCA113   | 27             | arib_LCE236     | 9              | brib_LCE232    | 300            | drib_LCE236    | 31             | nrjib_LCA113 | 3              |              |                |
| asrib_CLD      | 2              | arib_LCE255     | 879            | brib_LCE233    | 72             | drib_LCA127    | 2              | orjib_CLD    | 5              |              |                |
| arib_CODE85748 | 140            | arib_LCE256     | 547            | brib_LCE234    | 197            | drib_LCA197    | 4              | orjib_LCA127 | 3              |              |                |
| arib_CODE94656 | 2              | arib_LCE347     | 3950           | brib_LCE235    | 389            | drib_LCE227    | 7              | orjib_LCE229 | 4              |              |                |
| arib_CODE94657 | 26             | arib_LCE348     | 175            | brib_LCE236    | 715            | drib_LCE229    | 14             | prjib_LCA113 | 2              |              |                |
| arib_CODE94658 | 149            | arib_LCE349     | 100            | brib_LCE348    | 19             | drib_LCE230    | 67             | prjib_LCA116 | 2              |              |                |
| arib_LCA075    | 67             | arib_LCE351     | 29             | brib_LCE349    | 45             | drib_LCE236    | 495            | prjib_LCA127 | 3              |              |                |
| arib_LCA077    | 19             | arib_LCE354     | 7              | brib_LCE354    | 32             | drib_LCE227    | 77             | prjib_LCE229 | 53             |              |                |
| arib_LCA078    | 89             | arib_LCE350     | 42             | brib_LCE350    | 196            | drib_LCE229    | 43             | qrjib_LCE229 | 88             |              |                |
| arib_LCA079    | 67             | arib_LCE353     | 251            | brib_LCE353    | 298            | drib_LCE230    | 56             | rrjib_LCA113 | 2              |              |                |
| arib_LCA109    | 101            | arib_LCE601     | 499            | brib_LCE359    | 5              | drib_CLD       | 4              | rrjib_LCA127 | 3              |              |                |
| arib_LCA110    | 110            | arib_LCF425     | 438            | brib_LCE601    | 74             | drib_LCE227    | 16             | rrjib_LCE229 | 12             |              |                |
| arib_LCA111    | 119            | arib_LCH352     | 900            | brib_LCF425    | 84             | drib_LCE229    | 154            | srjib_LCA124 | 4              |              |                |
| arib_LCA112    | 4              | arib_ODh150     | 575            | brib_LCH353    | 6              | drib_LCE230    | 285            | srjib_LCA127 | 118            |              |                |
| arib_LCA113    | 3              | arib_ODh730     | 26             | brib_ODh730    | 18             | drib_CLD       | 6              | srjib_LCA197 | 3              |              |                |
| arib_LCA114    | 33             | asrib_LCA116    | 19             | crib_CODE94658 | 393            | drib_LCA127    | 2              | srjib_LCE229 | 14             |              |                |
| arib_LCA115    | 82             | asrib_LCA116    | 45             | crib_LCA075    | 7              | drib_LCE227    | 10             | trjib_LCA124 | 122            |              |                |
| arib_LCA116    | 3              | asrib_LCA116    | 53             | crib_LCA076    | 5              | drib_LCE229    | 49             | trjib_LCA128 | 2              |              |                |
| arib_LCA118    | 29             | asrib_LCA116    | 33             | crib_LCE227    | 22             | drib_CLD       | 5              | trjib_LCA197 | 3              |              |                |
| arib_LCA119    | 118            | asrib_LCA116    | 4              | crib_LCE229    | 25             | drib_LCA112    | 2              | urjib_LCA116 | 2              |              |                |
| arib_LCA120    | 21             | brjib_CLD       | 2              | crib_LCE230    | 8              | drib_LCA113    | 3              | urjib_LCE229 | 32             |              |                |
| arib_LCA121    | 71             | brjib_CODE94656 | 7              | crib_LCE233    | 28             | drib_LCA124    | 2              | vrjib_LCA197 | 2              |              |                |

Therefore, I recommend removing the files with a such small number of locations.

Table 1 shows information about hybrid and temperature (LCH and LCF, respectively). Nevertheless, when I downloaded the dataset I did not find information related to this kind of drifters. Besides this, please, remove temperature information in the NetCDF information (SST) because there is no data about that (as well as along the manuscript).

Following the data, you do not specify the units of zonal and meridional velocity in the files. I think you should explain how you calculate.

### Tracks 2009-100 2010: the CODE

Line 102. Measurements of CODE 110 cm x 15 cm? These values are confusing attending to Figure 2B.

Line 115: Could you check it with your data? And not only with this kind of a drifter.

### Tracks 2015-2022: coastal and offshore Nomad drifters

Line 156. Same here, in the dataset, there are no LCH and LCF files.

Line 157. Were the Southtek drifters drogued? Why is not shown in Figure 2?

Line 207. I do not understand: "A dedicated custom MATLAB tool..." What is this?

Line 213. "From the original 138..." Again, why? Which tracks?

Figure 4. Kind repetitive... you explain this in Table 1. There is a mistake in "th".

Line 225. Which figure?
